# Supplementary material for: Fluoroquinolone and beta-lactam antimicrobials induce different transcriptome profiles in Salmonella enterica persister cells
Source: PubMed Central journal article supplement (PMC10618250; doi:10.1038/s41598-023-46142-8), 2023-10-31

Supplementary data

FastANI comparison of *Salmonella* strains with *Salmonella enterica* reference genome  
ASM694v2 / ATCC 700720  
([https://www.ncbi.nlm.nih.gov/datasets/genome/GCF\\_000006945.2/](https://www.ncbi.nlm.nih.gov/datasets/genome/GCF_000006945.2/))

| <b>QUERY</b>                 | <b>REFERENCE</b>         | <b>ANI<br/>ESTIMATE</b> | <b>MATCHES</b> | <b>TOTAL</b> |
|------------------------------|--------------------------|-------------------------|----------------|--------------|
| <i>S. Schwarzengrund</i> S58 | GCF_000006945.2_ASM694v2 | 98.2649                 | 1426           | 1516         |
| <i>S. Enteritidis</i> 4SA    | GCF_000006945.2_ASM694v2 | 98.8289                 | 1475           | 1559         |
| <i>S. Enteritidis</i> 192    | GCF_000006945.2_ASM694v2 | 98.8467                 | 1482           | 1548         |

*S. Schwarzengrund* S58 (top) vs. ASM694v2 (bottom)

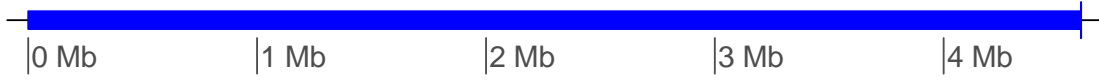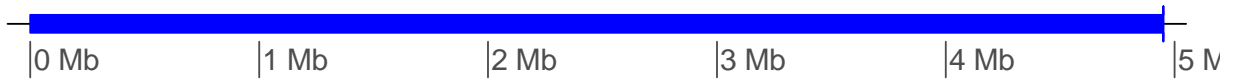

*S. Enteritidis* 4SA (top) vs. ASM694v2 (bottom)

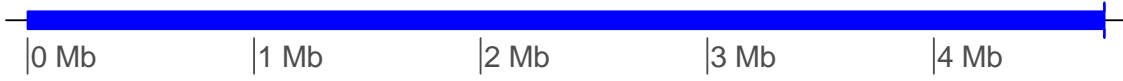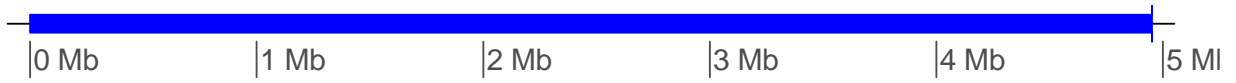

*S. Enteritidis* 192 (top) vs. ASM694v2 (bottom)

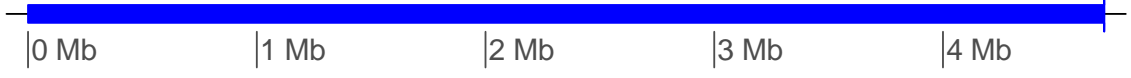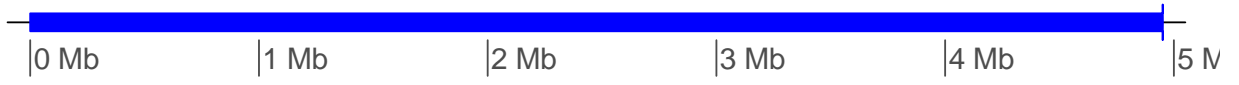

Supplement: 41598_2023_46142_MOESM9_ESM.pdf [file 41598_2023_46142_MOESM9_ESM.pdf]
